# Supplementary material for: Gene expression profiling of tumor-initiating stem cells from mouse Krebs-2 carcinoma using a novel marker of poorly differentiated cells
Source: PubMed Central journal article supplement (PMC5354742; doi:10.18632/oncotarget.14116), 2016-12-23
Supplement: oncotarget-08-9425-s001.pdf [file oncotarget-08-9425-s001.pdf]

## **Gene expression profiling of tumor-initiating stem cells from mouse Krebs-2 carcinoma using a novel marker of poorly differentiated cells**

### **Supplementary Materials**

**Supplementary Table S1: The list of genes investigated.** See [Supplementary\\_Table\\_S1](#)

**Supplementary Table S2: Comparison of investigated genes with literature data.** See [Supplementary\\_Table\\_S2](#)

**Supplementary Table S3: The list of genes activated by respective transcription factors.** See [Supplementary\\_Table\\_S3](#)
